# Supplementary material for: Pax3/7 duplicated and diverged independently in amphioxus, the basal chordate lineage
Source: PubMed Central journal article supplement (PMC6010424; doi:10.1038/s41598-018-27700-x), 2018-06-20
Supplement: 41598_2018_27700_MOESM1_ESM.pdf [file 41598_2018_27700_MOESM1_ESM.pdf]

## Supplementary Files, Tables & Notes

Barton-Owen, Ferrier & Somorjai

### *Pax3/7* duplicated and diverged independently in amphioxus, the basal chordate lineage

#### Table of contents

| Item                   | Description                                                                                                  | Page # |
|------------------------|--------------------------------------------------------------------------------------------------------------|--------|
| Supplementary Fig. S1  | WMISH images for <i>B. lanceolatum</i> L1 & L2                                                               | 2      |
| Supplementary Fig. S2  | WMISH images for <i>A. lucayanum</i>                                                                         | 2      |
| Supplementary Fig. S3  | Annotated amino acid alignment of cephalochordate Pax3/7 sequences                                           | 3      |
| Supplementary Table S1 | Details of cephalochordate genomic data used in Fig. 1A (mVISTA plot).                                       | 4      |
| Supplementary Table S2 | Details of primers and amplicons used as probes in WMISH experiment (Figs. 3, 4, S1).                        | 5      |
| Supplementary Table S3 | Details of accession numbers used in alignment/phylogenetic analyses.                                        | 6      |
| Supplementary Table S4 | Details of exon/intron structure for a selection of Pax3/7 homologues, showing the conserved exon structure. | 7      |
| Supplementary File 2   | FASTA format alignment of bilaterian Pax3/7 genes                                                            | 8-12   |
| Supplementary File 3   | FASTA format alignment of cephalochordate Pax3/7 genes                                                       | 3      |
| Supplementary File 4   | Python script to map equivalent support values between unadorned .nwk format trees                           | 14-16  |
| Supplementary Note     | Settings for the phylogenetic analyses                                                                       | 17-18  |

*Branchiostoma lanceolatum*

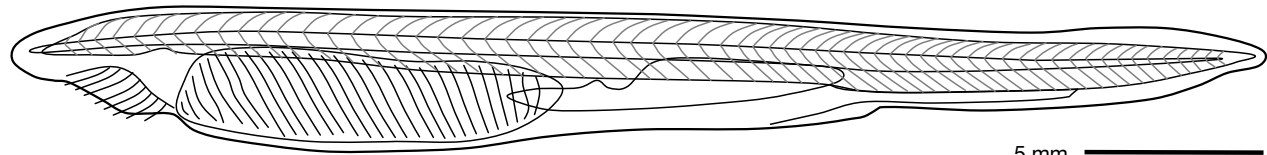

a. EARLY LARVA (L1)

b. PRE-MOUTH LARVA (L1)

c. LARVA (L2)

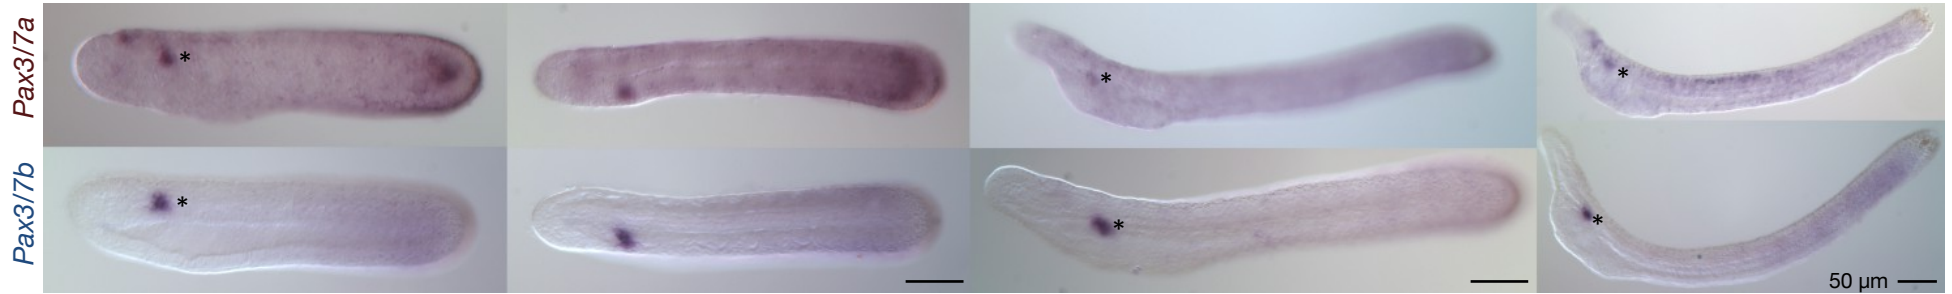

**Supplementary figure S1: Expression of Pax3/7a and Pax3/7b in a *B. lanceolatum* later developmental time course.** Top: Illustrative line drawing of adult *B. lanceolatum*. Scale bar  $\approx$  5 mm. Bottom: Whole mount *in situ* hybridization images of Pax3/7a-specific probe (top row of block) and Pax3/7b-specific probe (bottom row of block) in *B. lanceolatum* larvae. Views are presented in the left-to-right order: lateral (all) and dorsal (early larva only). All views are oriented with the anterior to the left. Asterisks mark to the immediate anterior the common sinistral domain of expression. (a) Early larva, L1, 30 hpf. (b) Pre-mouth neurula, L1, 36 hpf. (c) Larva, L2, 48 hpf. Scale bars = 50 micrometres.

*Asymmetron lucayanum*

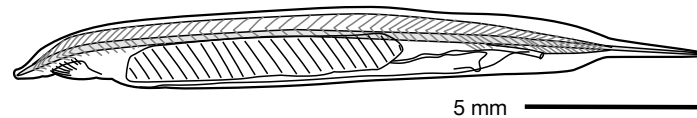

a. EARLY NEURULA (N1)

b. MID NEURULA (N2)

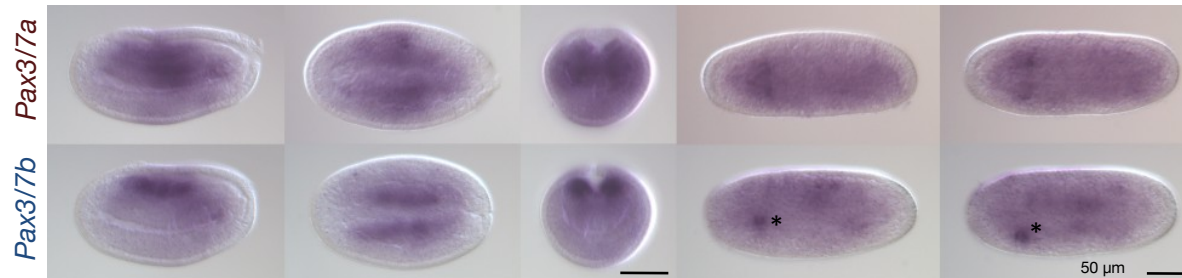

**Supplementary figure S2: Expression of Pax3/7a and Pax3/7b in an *A. lucayanum* early developmental time course.** Top: Illustrative line drawing of adult *A. lucayanum*, adapted from Andrews, E.A. *An undescribed acraniate: Asymmetron lucayanum* (Baltimore, 1893). Scale bar  $\approx$  5 mm. Bottom: Whole mount *in situ* hybridisation images of Pax3/7a-specific probe (top row of block) and Pax3/7b-specific probe (bottom row of block) in *A. lucayanum* embryos. Views are presented in the right-to-left order: lateral, dorsal, and blastoporal (early neurula only). Lateral and dorsal views are oriented with the anterior to the left. (a) Early neurula, N1, 12 hpf. (b) Mid neurula, N2, 16 hpf. Asterisks mark to the immediate anterior the sinistral domain of expression found in both paralogues and in *A. lucayanum*. Scale bars = 50 micrometres.



| Assembly        | Scaffold/contig                                  | Modifications                                                                                                                      |
|-----------------|--------------------------------------------------|------------------------------------------------------------------------------------------------------------------------------------|
| BI71nemr        | Sc0000222                                        | None                                                                                                                               |
| BRAFL v2        | scaffold23 contig4522                            | None                                                                                                                               |
|                 | scaffold23 contig 4524                           | None                                                                                                                               |
| HapV3           | scaffold5                                        | Trimmed to bases 2035000-4035000                                                                                                   |
| GCA_001663935.1 |                                                  |                                                                                                                                    |
| _Asyluc0.1      | LZCU01018971.1_scaffold1268824_cov58             | None                                                                                                                               |
|                 | LZCU01148733.1_scaffold328746_cov58              | None                                                                                                                               |
|                 | LZCU01080238.1_scaffold2528110_cov53             | Reverse complement                                                                                                                 |
|                 | LZCU01117694.1_scaffold2608874_cov71             | Reverse complement                                                                                                                 |
|                 | LZCU01137041.1_scaffold2697051_cov71             | Reverse complement; padded 3' & 5' with 2,000 Ns to prevent VISTA alignment ignoring it                                            |
|                 | LZCU01078009.1_scaffold2501631_cov61             | None                                                                                                                               |
|                 | LZCU01058212.1_scaffold20007_cov45               | Reverse complement; extended 3' with SRA data                                                                                      |
|                 | LZCU01078009.1_scaffold2501631_cov61             | Extended 5' with SRA data                                                                                                          |
|                 | LZCU01179060.1_scaffold612678_cov42              | Reverse complement; split into two pieces to allow insertion of scaffold628499; assembly gaps in first half improved with SRA data |
|                 | LZCU01180542.1_scaffold628499_cov66              | Reverse complement                                                                                                                 |
|                 | LZCU01040462.1_scaffold1632309_cov71             | None                                                                                                                               |
|                 | LZCU01174809.1_scaffold568960_cov59              | Reverse complement                                                                                                                 |
|                 | LZCU01210302.1_scaffold973465_cov59              | None                                                                                                                               |
|                 | LZCU01048762.1_scaffold17933_cov44               | Reverse complement                                                                                                                 |
|                 | LZCU01157810.1_scaffold40939_cov53_m<br>id_whole | Gap partially filled with SRA data                                                                                                 |
|                 | LZCU01012722.1_scaffold1175651_cov61             | None                                                                                                                               |
|                 | LZCU01126896.1_scaffold2650035_cov73             | None                                                                                                                               |
|                 | LZCU01085103.1_scaffold2534474_cov61             | None                                                                                                                               |

**Supplementary Table S1:** Details of cephalochordate genomic data used in Fig. 1A (mVISTA plot)

|                | 5'                   | 3'                    | AMPLICON ( <i>B.lan</i> )                                                                                                                                                                                                                                                                                                                                                                                                                                                                                                                                                                      | AMPLICON ( <i>A.luc</i> )                                                                                                                                                                                                                                                                                                                                                                                                                                                                                                                                                                     |
|----------------|----------------------|-----------------------|------------------------------------------------------------------------------------------------------------------------------------------------------------------------------------------------------------------------------------------------------------------------------------------------------------------------------------------------------------------------------------------------------------------------------------------------------------------------------------------------------------------------------------------------------------------------------------------------|-----------------------------------------------------------------------------------------------------------------------------------------------------------------------------------------------------------------------------------------------------------------------------------------------------------------------------------------------------------------------------------------------------------------------------------------------------------------------------------------------------------------------------------------------------------------------------------------------|
| <b>Pax3/7a</b> | CTGGAGGAAGCAGCAGGG   | GCCCAGTCCGTTACCAA     | <u>CTGGAGGAAGCAGCAGGGCGCCCAGCAGATACC</u><br>GTCCTTCATGCCGCTGGGATACCCCGCTCCCGCC<br>GCCGGGACACCCACCTACATGCCGGTCCCCGAGC<br>CCGCATACCCAAGTAGCGCTCAAGATTCGGCAACC<br>CTGCACAGACCGCAGCCTTTGCCCCACCAGCA<br>TCCATCAGAGCGGGGCTGCAGACACGGCCAGCAT<br>GTACGGCACTGCCAGCAAACCTTACCAGTACCCTT<br>TCACCGACTCCTACCTGTCCTCGGGATCCACCGGT<br>CTGTCTGTCAGCAGTGAATGTCGACTGG <u>GTTGGT</u><br><u>GAACGGACTGGGC</u>                                                                                                                                                                                                      | <u>CTGGAGGAAGCAGCAGGGCGCCCAGCAGATACC</u><br>GTCCTTCATGCCGCTGGGATACCCCGCTCCCGCC<br>GCCGGGACACCCACCTACATGCCGGTCCCCGAGC<br>CCGCATACCCAAGTAGCGCTCAAGATTCGGCAACC<br>CTGCACAGACCGCAGCCTTTGCCCCACCAGCA<br>TCCATCAGAGCGGGGCTGCAGACACGGCCAGCAT<br>GTACGGCACTGCCAGCAAACCTTACCAGTACCCTT<br>TCACCGACTCCTACCTGTCCTCGGGATCCACCGGT<br>CTGTCTGTCAGCAGTGAATGTCGACTGG <u>GTTGGT</u><br><u>GAACGGACTGGGC</u>                                                                                                                                                                                                     |
| <b>Pax3/7b</b> | CTTCAACCACCTGCTACCCA | CCCGTACTGATAGGTGTCATG | <u>CTTCAACCACCTGCTACCCA</u> TGGGCTACCCCGCC<br>GGAGCCACTGCGCATGCGTCAGCAGCCTACGTCC<br>CGCTGGCGGACACCAGTTATCCCATCACTTCACAA<br>GTAGAATCGACCACCTTGCACCGACCGCAGCCCC<br>TCCCCCGTCTACGGTGCACCAGAGCATGGCGGC<br>CGACTCCACGTCCCTCGTACGGCACGGCCAGCAAG<br>GCGTACCAGTTCACGGGCCTCTCCGACTCCTTCGT<br>CGCCACCGCAGCCAACCACAACACGCTCTCTGGA<br>GGGGTATTGAACATCCTAGGCAACCCAGCACGT<br>GCCAACAAGACTACCCTCTCGCCTCGCTCTCAACC<br>TCCATGGACTCCACGCAAGCCACCAGCTCAGAAA<br>GCTTCACGGCGCATGCGTCGACCCACGACAGCTA<br>CGCCGCGCATGCTCAGTCGTAAGTGCACCCCGCCT<br>AGCTACTCGACCACCGCCACCCGTACAG <u>CATGG</u><br><u>ACACCTATCAGTACGGG</u> | <u>CTTCAACCACCTGCTACCCA</u> TGGGCTACCCCGCC<br>GGAGCCACTGCGCATGCGTCAGCAGCCTACGTCC<br>CGCTGGCGGACACCAGTTATCCCATCACTTCACAA<br>GTAGAATCGACCACGTTGCACCGACCAAGCCCC<br>TCCCCCGTCTACGGTGCACCAGAGCATGGCGGC<br>CGACTCCACGTCCCTCGTACGGCACGGCCAGCAAG<br>GCGTACNAGTTCACGGGCCTCTCCGACTCCTTCGT<br>CGCCACCGCAGCCAATCACAACACGCTCTCTGGA<br>GGGGTATTGAACATCCTCGGCAACCCAGCACGT<br>GCCAACAAGACTACCCTCTCGCCTCGCTCTCAACC<br>TCCATGGACTCCACGCAAGCCACCAGCTCAGAAA<br>GCTTCACGGCGCATGCGTCGACACACGACAGCTA<br>CGCCGCGCATGCTCAGTCGTAAGTGCACCCCGCCT<br>AGCTACTCGACCACCGCCACCCGTACAG <u>CATGG</u><br><u>ACACCTATCAGTACGGG</u> |

**Supplementary Table S2:** Details of primers and amplicons used as probes in WM/SH experiment (Figs. 3, 4, S1)

| <b>Group/Species</b>             | <b>Accession details</b> |                   |                         |
|----------------------------------|--------------------------|-------------------|-------------------------|
| <b>VERTEBRATES</b>               | <b>Pax3</b>              | <b>Pax7</b>       | <b>-</b>                |
| <i>Homo sapiens</i>              | NP_852123.1              | NP_001128726.1    | -                       |
| <i>Mus musculus</i>              | AAH48699.1               | NP_035169.1       | -                       |
| <i>Gallus gallus</i>             | BAB85652.1               | XP_015152318.1    | -                       |
| <i>Python bivitattus</i>         | XP_007425723.1           | XP_007424290.1    | -                       |
| <i>Danio rerio</i> (a)           | AAC41253.1               | CAM12909.1        | -                       |
| <i>Scyliorhinus torazame</i>     | BAM15710.1               | BAM15711.1        | -                       |
| <i>Petromyzon marinus</i>        | -                        | AAL04156.1        | -                       |
| <b>CEPHALOCHORDATES</b>          | <b>Pax3/7a</b>           | <b>Pax3/7b</b>    | <b>-</b>                |
| <i>Branchiostoma lanceolatum</i> | MF979121                 | MF979122          | (new)                   |
|                                  | ACE79721.1               | -                 | (old)                   |
| <i>Branchiostoma floridae</i>    | MF979123                 | MF979124          | (new)                   |
|                                  | EEN66816.1               | -                 | (old)                   |
| <i>Branchiostoma belcheri</i>    | MF979125                 | MF979126          | (new)                   |
|                                  | -                        | ABK54280.1        | (old)                   |
| <i>Asymmetron lucayanum</i>      | MF979127                 | MF979128          | (new)                   |
|                                  | -                        | -                 | (old)                   |
| <b>OTHER DEUTEROSTOMES</b>       | <b>Pax3/7</b>            | <b>-</b>          | <b>-</b>                |
| <i>Halocynthia roretzi</i>       | BAA12289.1               | -                 | -                       |
| <i>Saccoglossus kowalevskii</i>  | XP_006823827.1           | -                 | -                       |
| <b>ARTHROPODS</b>                | <b>paired</b>            | <b>gooseberry</b> | <b>gooseberry-neuro</b> |
| <i>Tribolium castaneum</i>       | NP_001071090.1           | EFA09269.2        | EFA09140.1              |
| <b>OTHER PROTOSTOMES</b>         | <b>Pax3/7</b>            | <b>-</b>          | <b>-</b>                |
| <i>Crassostrea gigas</i>         | EKC41820.1               |                   |                         |
| <i>Capitella teleta</i>          | ABC68267.1               |                   |                         |

**Supplementary Table S3:** Details of accession numbers used in alignment/phylogenetic analyses

| SPECIES                           | ACCESSION                 | GENE        | ISO- | FORM     | # EXONS            | EXON LENGTHS, AA                        | PRD<br>BOX<br>POS'N | LEN ^      | HOM.<br>DOM.<br>POS'N | LEN ^     | Pax7<br>DOM.<br>POS'N | LEN ^     |
|-----------------------------------|---------------------------|-------------|------|----------|--------------------|-----------------------------------------|---------------------|------------|-----------------------|-----------|-----------------------|-----------|
| <i>Mus musculus</i>               | AAH48699.1                | 3           | b    | 9        |                    | 28 78 43 45 68 55 71 82 11*             | 34-159              | 125        | 222-275               | 53        | 347-391               | 44        |
| <i>Homo sapiens</i>               | NP_852124.1               | 3           | 3    | 8        |                    | 28 78 43 45 68 55 71 89*                | 34-159              | 125        | 222-275               | 53        | 347-391               | 44        |
| <i>Gallus gallus</i>              | BAB85652.1                | 3           | -    | 6        | partial chromosome | 47 68 55 71 82 11*                      | 34-161              | 195        | 222-275               | 53        | 347-391               | 44        |
| <i>Alligator mississippiensis</i> | XP_006266132.1            | 3           | X2   | 9        |                    | 28 78 43 45 68 55 71 82 11*             | 34-159              | 193        | 222-275               | 53        | 347-391               | 44        |
| <i>Danio rerio</i>                | NP_571352.1/AAC41253.1    | 3a          | -    | 8        |                    | 28 78 43 48 66 55 73 116*               | 34-159              | 193        | 223-276               | 53        | 350-394               | 44        |
| <i>Danio rerio</i>                | NP_001315326.1            | 3b          | -    | 9        |                    | 28 78 42 51 66 55 62 73 11*             | 34-158              | 192        | 225-278               | 53        | 346-385               | 39        |
| <i>Callorhinchus milii</i>        | XP_007887991.1            | 3           | -    | 13       |                    | 56 66 58 19 14 77 43 45 66 55 71 82 11* | 220-346             | 126        | 405-458               | 53        | 543-574               | 31        |
| <i>Mus musculus</i>               | NP_035169.1               | 7           | -    | 9        |                    | 28 78 43 43 66 55 67 82 38*             | 34-159              | 193        | 218-271               | 53        | 345-383               | 38        |
| <i>Homo sapiens</i>               | NP_002575.1/CAA65522.1    | 7           | 1    | 8        |                    | 28 78 43 45 66 55 67 136*               | 34-163              | 197        | 220-273               | 53        | 347-385               | 38        |
| <i>Gallus gallus</i>              | NP_990396.1               | 7           | -    | 10       |                    | 28 78 43 43 66 55 66 22 82 38*          | 34-159              | 193        | 218-271               | 53        | 352-382               | 30        |
| <i>Danio rerio</i>                | XP_009304561.1/CAM12909.1 | 7a          | X1   | 9        |                    | 28 78 43 43 66 55 65 83 38*             | 34-161              | 195        | 218-271               | 53        | 338-381               | 43        |
| <i>Danio rerio</i>                | NP_001139621.1            | 7b          | -    | 9        |                    | 28 78 52 43 65 55 65 83 38*             | 34-170              | 204        | 226-279               | 53        | 346-389               | 43        |
| <i>Callorhinchus milii</i>        | XP_007896063.1            | 7           | -    | 9        |                    | 28 78 43 43 67 55 58 82 38*             | 34-161              | 195        | 219-272               | 53        | 344-378               | 34        |
| <i>A. mississippiensis</i>        | XP_014457309.1            | 7           | -    | 9        |                    | 46 43 43 66 55 66 82 38*                |                     | 0          | 157-210               | 53        | 283-321               | 38        |
| <i>Lethenteron japonicum</i>      | KE993866.1:1              | 7           | -    | 9        |                    | 18 79 43 49 69 54 68 90 39*             | 24-149              | 173        | 215-268               | 53        | 347-380               | 33        |
| <i>Saccoglossus kowalevski</i>    | XP_006823827.1            | 3B-I        |      | 6        |                    | 16 162 66 55 51 90*                     | 17-141              | 158        | 202-254               | 52        |                       |           |
| <b><i>B. lanceolatum</i></b>      | <b>MF979121</b>           | <b>3/7a</b> |      | <b>7</b> |                    | <b>23  162  65 49 60 79 42*</b>         | <b>24-151</b>       | <b>175</b> | <b>207-260</b>        | <b>53</b> | <b>320-364</b>        | <b>44</b> |
| <b><i>B. lanceolatum</i></b>      | <b>MF979122</b>           | <b>3/7b</b> |      | <b>6</b> |                    | <b>  178  62 54 59 79 39*</b>           | <b>9-136</b>        | <b>143</b> | <b>197-250</b>        | <b>53</b> | <b>316-357</b>        | <b>41</b> |
| <i>Ciona intestinalis</i>         | XP_018669403.1            | 3/7         |      | 10       |                    | 15 55 49 38 75 75 85 95 96 39*          | 16-143              | 127        | 192-245               | 53        |                       |           |

Supplementary Table S4: Details of exon/intron structure for a selection of Pax3/7 homologues, showing the conserved exon structure

## Supplementary File 2: FASTA format alignment of Bilaterian Pax3/7 genes

>Pax4/6\_B\_floridae\_(ROOT)/1-483  
-----MPHKAWTLQRPADHAQYS-----PVQ-----ADPGHSGVNQLGGVVFVGGRRPLPDSTRRKIVELAHQGARP  
CDISRLLQVSNGCVSKILGRYYETGSIIRPRAIGGSKPR-VATPEVAKIAQFKRECPSIFAWIIRDRLLESEGICTNENIPS-----VSSI  
NRVLRNLA---SGEKNTLQS-LQSADPQMLEKRLLLNGNAWPHPGWPYPSTAGAPPPQTNGNVTTKKEGDKLASQILTLHGYPDQGD  
GSNDDSDAEARLRLKRKLQRNRTSFTQEIEALEKEFERTHYPDVFAERLAAKIDLPEARIQVWFSNRRARWRREKLRN--QRSSQ-  
DSDSSSP-----SRIP-----ISSS-----FSTATMYQ-----  
-----PIAPPSAPVMSR-----SSHAGLTDYSYSSLPPVPSFS---  
-----VPGNMAPMPSMQ-----  
-----QSRDQTSYSCMIPHSTAM-----TPR---G  
YDSLALGSY---NPTHAG-----HHVTTTHPSHMQAPSMPGH--SHMSHANGGSAGL-ISPQVS-----  
-VPVQVPGAVTEEMT-----SQPYWPRIQ

>PAX3\_H\_sapiens/1-484  
---MTTLAGAVPRMMRPGPGQNYPR-SGFPLEVSTPL-----GQGRVNQLGGVFINRPLPNHIRHKIVEMAHHGIRP  
CVISRQLRVSHGCVSKILCRYQETGSIIRPGAIGGSKPKQVTTDPVEKKIEEYKRENPGMFWEIRDKLLKDAVCDRNTVPS-----VSSI  
SRILRSKF---GKGEEEEAD-LERKEA-----EESKAKKHSIDGILSERASA-----PQSD  
E-G-SDIDSEPDLPKRRQRRSRTTFTAQLEELERAFERTHYPDIYTREELAQRAKLTEARVQVWFSNRRARWRKQAGANQ---LMAF-  
-NHL-IP-----GGFP-----PTA-----MPTLPTYQLSETS---YQPTSIPQAVSDPSS-----  
-----TVHRPQLPPST-VHQSTI---P-----SNPDSSAYCLPSTR---HGFSSYTDSEFVP-PSGSPNPMNP  
TIGNGLSPQ---VMGLLT-----NHGGVPHQPQTD-----  
-----YALSPL--TGGLEPTTTV-----SASC--SQR---  
LDHMKSLDS---LPTSQSYCP-----P---TYSTTG--YSMDP-V-TGY--QY-GQYQSAFHY-LKPDIA-----  
-----

>PAX3\_M\_musculus/1-484  
---MTTLAGAVPRMMRPGPGQNYPR-SGFPLEVSTPL-----GQGRVNQLGGVFINRPLPNHIRHKIVEMAHHGIRP  
CVISRQLRVSHGCVSKILCRYQETGSIIRPGAIGGSKPKQVTTDPVEKKIEEYKRENPGMFWEIRDKLLKDAVCDRNTVPS-----VSSI  
SRILRSKF---GKGEEEEAD-LERKEA-----EESKAKKHSIDGILSERASA-----PQSD  
E-G-SDIDSEPDLPKRRQRRSRTTFTAQLEELERAFERTHYPDIYTREELAQRAKLTEARVQVWFSNRRARWRKQAGANQ---LMAF-  
-NHL-IP-----GGFP-----PTA-----MPTLPTYQLSETS---YQPTSIPQAVSDPSS-----  
-----TVHRPQLPPST-VHQSTI---P-----SNADSSAYCLPSTR---HGFSSYTDSEFVP-PSGSPNPMNP  
TIGNGLSPQ---VMGLLT-----NHGGVPHQPQTD-----  
-----YALSPL--TGGLEPTTTV-----SASC--SQR---  
LEHMKNVDS---LPTSQPYCP-----P---TYSTAG--YSMDP-V-TGY--QY-GQYQSAFHY-LKPDIA-----  
-----

>PAX3\_G\_gallus/1-484  
---MTTLAGAVPRMMRPGAGQSYPR-GGFPLEVSTPL-----GQGRVNQLGGVFINRPLPNHIRHKIVEMAHHGIRP  
CVISRQLRVSHGCVSKILCRYQETGSIIRPGAIGGSKPKQVTTDPVEKKIEEYKRENAGMFWEIRDKLLKDGVCDRNTVPS-----VSSI  
SRILRSKF---GKGEEEEAE-LERKEA-----EEDKAKKHSIDGILSERASA-----AQSD  
E-G-SDIDSEPDLPKRRQRRSRTTFTAQLEELERAFERTHYPDIYTREELAQRAKLTEARVQVWFSNRRARWRKQAGANQ---LMAF-  
-NHL-IP-----GGFP-----PSA-----MPTLPTYQLSEPS---YQPTSIPQAVSDPSS-----  
-----TVHRPQLPPST-VHQSSL---P-----SNPESSAYCLPSTR---HGFSSYTDSEFVP-PSGSPNPMNP  
AIGNGLSPQ---VMGLLT-----NHGGVPHQPQTD-----  
-----YALSPL--TGGLEPTTTV-----SASC--SQR---  
LDHMKSLDS---LPTSQSYCP-----P---TYSTTG--YSMDP-V-TGY--QY-GQYQSAFHY-LKPDIA-----  
-----

>PAX3\_P\_bivittatus/1-484  
---MTTLGAVPRMMRPPAGQNYPR-SGFPLEVSTPL-----GQGRVNQLGGVFINRPLPNHIRHKIVEMAHHGIRP  
CVISRQLRVSHGCVSKILCRYQETGSIIRPGAIGGSKPKQVTTDPVEKKIEEYKRENAGMFWEIRDKLLKDGVCDRNTVPS-----VSSI  
SRILRSKF---GKGEEEEGE-LERKEA-----EENKAKKHSIDGILSERASA-----PQSD  
E-G-SDIDSEPDLPKRRQRRSRTTFTAQLEELERAFERTHYPDIYTREELAQRAKLTEARVQVWFSNRRARWRKQAGANQ---LMAF-  
-NHL-IP-----GGFP-----PTA-----MPTLPTYQLSESS---YQPTSIPQAVSDPSS-----  
-----TVHRPQLPPST-VHQSSL---P-----SNPDSSAYCLPSTR---HGFSSYTDSEFVP-PSGSPNPMNP  
AIGNGLSPQ---VMGLLT-----NHGGVPHQPQTD-----  
-----YALSPL--TGGLEPTTTV-----SASC--SQR---  
LDHMKSLDS---LPTSQSYCP-----P---TYSTTG--YSMDP-V-PGY--QY-GQYQSAFHY-LKPDIA-----  
-----

>Pax3\_D\_riero/1-509  
---MTALAGGISRMMRPTPPQNYPR-GGYSLEVSTPL-----GQGRVNQLGGVFINRPLPNHIRHKIVEMAHHGIRP  
CVISRQLRVSHGCVSKILCRYQETGSIIRPGAIGGSKPKQSTTDPVEKKIEEYKRENPGMFWEIRDKLLKDGICDRNNVPS-----VSSI  
SRMLRCKFGGNGDEDEDDE-VEKREI-----EENERRAKHSIDGILGDRSS-----HSD  
E-G-SDVDSEPLPKRRQRRSRTTFTAQLEELERAFERTHYPDIYTREELAQRAKLTEARVQVWFSNRRARWRKQAGANQ---LMAF-  
-NHL-IP-----GGFP-----PSA-----MSSLQPYQLADSP---YPPSSISQ-VSEQPS-----  
-----TVHRPQLPPST-VHQSGLSGP-----GAQEGSSAYCLS SGR---HGFSGYSDGYVA-APGHANPVNP  
SISNGLSPQ---VMGLLT-----NPGAVPHQPQSD-----  
-----FALSPL--TGGLEPSTGM-----PASCHSSQR---  
LEALPGLPSMPALPSSQSYCP-----S---SYSSPG--YSVDH-V-ASY--QY-SQYQSKVNTSTVTTVERLSRVY  
PLKR-----ASFGLVE-----

>Pax7\_S\_torazame/1-495  
---MTSLTGAPRMMRPSPGQSYR-TGFPLEVSTPL-----GQGRVNQLGGVFINRPLPNHIRHKIVEMAHHGIRP



CVISRQLRVSHGCVSKILCRYQETGSIRPGAIGGSKPRQVATPDVEKKIEEYKRENPGMFSWEIRDKLLKDGICDRSSVPS-----VSSI  
SRVLRAKF---GRRDDDE-E-MEKKD-----EDGVRKTKHSIDGILGKGN-----RLD  
D-GASDVESEPDPLKRRQRRSRTTFTAEQLEELEKAFERTHYPDYITREELAQRKLTARVQVWF SNRRARWRKQAGANQ---LAAF-  
-NHL-LP-----GGFP-----PTG-----MPTLPPYQLPEAS---YPTTTSQ---DGG-  
-----TVHRPQLPPSS-MHQSGL-----TSAAESGSYGLAPNR---HTFSSYPSEFMN-ATGANNPMN-  
-----Q-----VMSILS-----NPGAVPPQPQHD-----  
-----FSISPL--HGSLDTSNPL-----SASC--SQR-----  
SDSIKGVES---LPSSQSYCT-----P---AYSTSG--YSMDP-V-PGY--QY-AQYQSAVDY-LTKNVS-----  
-LSTQRRMKLSEHSAVLGLLQV---ET--GQAY-----

>PAX7\_H\_sapiens/1-505

---MAALPGTVPRMMPAPGQNYPR-TGFPLEVSTPL-----GQGRVNQLGGVFINGRPLPNHIRHKIVEMAHHGIRP  
CVISRQLRVSHGCVSKILCRYQETGSIRPGAIGGSKPRQVATPDVEKKIEEYKRENPGMFSWEIRDRLDKDGHCDRSTVPSG---LVSSI  
SRVLRIFK---GKKEED-E-ADKKE-----DDGEKKAKHSIDGILGDKGN-----RLD  
E-G-SDVESEPDPLKRRQRRSRTTFTAEQLEELEKAFERTHYPDYITREELAQRKLTARVQVWF SNRRARWRKQAGANQ---LAAF-  
-NHL-LP-----GGFP-----PTG-----MPTLPPYQLPDST---YPTTTSQ---DGG-  
-----TVHRPQLPPST-MHQGGLAAA-----AAADTSSAYG---AR---HSFSSYSDFMN-PAAPSNHMNP  
-VSNGLSPQ---VMSILG-----NPSAVPPQPQAD-----  
-----FSISPL--HGGLDSATSI-----SASC--SQR-----  
ADSIKPGDS---LPTSQAYCP-----P---TYSTTG--YSVDP-V-AGY--QY-GQYQTAVDY-LAKNVS-----  
-LSTQRRMKLGEHSAVLGLLPV---ET--GQAY-----

>PAX7\_M\_musculus/1-503

---MAALPGAVPRMMPGQNYPR-TGFPLEVSTPL-----GQGRVNQLGGVFINGRPLPNHIRHKIVEMAHHGIRP  
CVISRQLRVSHGCVSKILCRYQETGSIRPGAIGGSKPRQVATPDVEKKIEEYKRENPGMFSWEIRDRLDKDGHCDRSTVPS-----VSSI  
SRVLRIFK---GKKEDE-E-GDKKE-----EDGEKKAKHSIDGILGDKGN-----RLD  
E-G-SDVESEPDPLKRRQRRSRTTFTAEQLEELEKAFERTHYPDYITREELAQRKLTARVQVWF SNRRARWRKQAGANQ---LAAF-  
-NHL-LP-----GGFP-----PTG-----MPTLPPYQLPDST---YPTTTSQ---DGG-  
-----TVHRPQLPPST-MHQGGLAAA-----AAADTSSAYG---AR---HSFSSYSDFMN-PGAPSNHMNP  
-VSNGLSPQ---VMSILS-----NPSAVPPQPQAD-----  
-----FSISPL--HGGLDSASSI-----SASC--SQR-----  
ADSIKPGDS---LPTSQAYCP-----P---TYSTTG--YSVDP-V-AGY--QY-SQYQTAVDY-LAKNVS-----  
-LSTQRRMKLGEHSAVLGLLPV---ET--GQAY-----

>PAX7\_G\_gallus/1-502

---MAALPGTVPRMMPAPGQNYPR-TGFPLEVSTPL-----GQGRVNQLGGVFINGRPLPNHIRHKIVEMAHHGIRP  
CVISRQLRVSHGCVSKILCRYQETGSIRPGAIGGSKPRQVATPDVEKKIEEYKRENPGMFSWEIRDRLDKDGHCDRSTVPS-----VSSI  
SRVLRIFK---GKKEEEE-D-CDKKE-----EDGEKKAKHSIDGILGDKGN-----RLD  
E-G-SDVESEPDPLKRRQRRSRTTFTAEQLEELEKAFERTHYPDYITREELAQRKLTARVQVWF SNRRARWRKQAGANQ---LAAF-  
-NHL-LP-----GGFP-----PTG-----MPTLPPYQLPDST---YPTTTSQ---DGG-  
-----TVHRPQLPPST-MHQGGL-AAA-----AAADSSAYG---AR---HSFSSYSDFMN-AAAPANHMNP  
-VSNGLSPQ---VMSILS-----NPSGVPPQPQAD-----  
-----FSISPL--HGGLDTTNSI-----SASC--SQR-----  
SDSIKSVDS---LPTSQAYCP-----P---TYSTTS--YSVDP-V-AGY--QY-GQYQTAVDY-LTKNVS-----  
-LSTQRRMKLGEHSAVLGLLPV---ET--GQAY-----

>PAX7\_P\_bivittatus/1-501

---MAALPGTVPRMMPAPGQNYPR-TGFPLEVSTPL-----GQGRVNQLGGVFINGRPLPNHIRHKIVEMAHHGIRP  
CVISRQLRVSHGCVSKILCRYQETGSIRPGAIGGSKPRQVATPDVEKKIEEYKRENPGMFSWEIRDRLDKDGHCDRTTVP-----VSSI  
SRVLRIFK---GKKEED-D-CEKKE-----EDCEKKAKHSIDGILGDKGS-----RLD  
E-G-SDVESEPDPLKRRQRRSRTTFTAEQLEELEKAFERTHYPDYITREELAQRKLTARVQVWF SNRRARWRKQAGANQ---LAAF-  
-NHL-LP-----GGFP-----PAG-----MPTLPPYQLPDST---YPTTTSQ---DGG-  
-----TVHRPQLPPST-MHQGGL--SA-----TTGDSNSAYG---AR---HGFSSYTDSEFMN-PTAPANHMNP  
-VSNGLSPQ---VMSILS-----HPSGAPPAPAD-----  
-----FSISPL--HGGLDSTNSL-----SASC--SQR-----  
SESIKSVDS---LPTSQAYCP-----P---TYTSTG--YSVDP-V-AGY--QY-GQYQTAVDY-LTKNVS-----  
-LSTQRRMKLGEHSAVLGLLPV---ET--GQAY-----

>Pax7\_D\_reio/1-507

---MATLPGTVPRMMPAPGQNYPR-TGFPLEVSTPL-----GQGRVNQLGGVFINGRPLPNHIRHKIVEMAHHGIRP  
CVISRQLRVSHGCVSKILCRYQETGSIRPGAIGGSKPRQVATPDVEKRIEYKRENPGMFSWEIRDKLLKDGVCDRGTVPSEASSVSSI  
SRVLRARF---GKKDDDD-E-CDKKD-----EDGEKTKHSIDGILGDKGN-----RTD  
E-G-SDVESEPDPLKRRQRRSRTTFTAEQLEELEKAFERTHYPDYITREELAQRKLTARVQVWF SNRRARWRKQAGANQ---LAAF-  
-NHL-LP-----GGFP-----PTG-----MPTLPTYQLPEST---YPTTTSQ---DGG-  
-----TLHRPQLPPSS-MHQGGL-----SADSGSAYGLSSNR---HTFSSYSETFMS-PTASSNHMNP  
-VSNGLSPQ---VMSILS-----NPSAVPSQPQHD-----  
-----FSISPL--HGGLDSTNSI-----SASC--SQR-----  
SDPIKSVDS---LASTQSYCP-----P---TYSATS--YSVDP-VTAGY--QY-SQYQTAVDY-LAKNVS-----  
-LSTQRRMKLGDHSAVLGLLQV---ET--GQAY-----

>Pax3\_S\_torazame/1-506

---MSTLAGPLPRMMPAPGQSYPRSSGFPLEVSTPL-----GQGRVNQLGGVFINGRPLPNHIRHKIVEMAHHGIRP  
CVISRQLRVSHGCVSKILCRYQETGSIRPGAT-GSKPRQMAIPDVEKKIEEYKKNENPMGFSWEIRDKLLKDGMCDRNTIPS-----VSSI  
SRILRSRF---GKKEDEEDD-CERKEY-----EEGKTKHSIDGILANKAN-----NSD  
E-A-SDIDSEPDPLKRRQRRSRTTFTAEQLEELERAFERTHYPDYITREELAQRKLTARVQVWF SNRRARWRKQAGANQ---LAAF-  
-NHL-IP-----GGFP-----PTA-----MPALSPYQLSDAS---YPPTSIPQAISDPN-----  
-----TVHRPQLPPTS-VHQSSL---P-----STPDSSAYCLSTSR---HGFSGYTDSEFVS-PTGSTNPMNP

TVSNGLSPQ---VMGLLA-----NPGGVPHQPQTD-----  
-----YALSPL--TGGLEPSTSV-----SASC--SQR---  
LDPMKPLDS---LPTTQSYCP-----S---TYSSSG--YSMDS-V-AGY--QY-QYQGQSKCHVNLSTNTFSYKNAYP  
PHPSSICIKMCD5VYKL-----

>Pax7\_\_P.\_marinus/1-505

-----MMRPAPGQNYPR-SGFPLEVSTPL-----GQGRVNQLGGVFINGRPLPNHIRHKIVELAHHGVRP  
CVISRQLRVSHGCVSKILCRYQETGSIRPGAIGGSKPRQVASTDVERKIEEYKRENPGMFSWEIRDRLLDKGMCDRSTVPS-----VSSI  
SRILRAKF--GKRDEEEEGAEKKDF-----GDDGDKKAKHSIDGILGDKAG-----STV  
E-DSSDSDSEPDPLPKRQRRSRTTFTAEQLEELEKAFERTHYDPIYTREELAQRKLTARVQVWFSNRRARWRKQAGANQ---LAAF-  
-NHL-IP-----GGFP-----PAS-----MPGLPPYQLPEGP---YPGSGIPQ--VDTGT-----  
-----TVHRPQPLPSS-MHQGGG---L-----AGDGDAGAYGLSSNR---SGF--YSDSFMSAASAPSNHMAP  
-MANGLSQP---MMGILG-----NPSAMPQHQQE-----  
-----YLSPLPSSGLVDHSSGL-----SASC--SQRGGGG  
GDGMKHGDG---LPPP-GLLP-----A---TYAAG--YGLEP-MPAAY--QY-QYQGQTAADY-LAKNVG-----  
-LGGQRRLLKGEHSAVLGLLQV---AET--GQAY-----

>Pax3/7b\_\_A.\_lucayanum/1-469

-----MALF---FVLP-----GQGRVNQLGGVFINGRPLPNHIRHKIVEMAAAGIRP  
CVISRQLRVSHGCVSKXXXXXXGSGKPR-VATPEVEKKIEDYKRDNPGMFSWEIRDRLLDKGMCDRSTVPS-----VSSI  
SRILRGGKGDGRRSDD-DSE-DERKDG-----EDGEKRSHSIDGILGKGG-----CRG  
E-D-SDCDSEPDPLPKRQRRSRTTFTPEQLELEKAFERTHYDPIYTREELAQRKLTARVQVWFSNRRARWRKQAGAQQ---LAGF-  
-NHL-LP-----MGYPAGATAHASAAY---VP-----LADTS---YPITSQVE---ST-----  
-----TLHRPQPLPST-VHQSM-----ADSTSSYGTAGKA---YQFTGLSDSFVATAAN-----  
--HNTLSGG---VLNILG-----NPST---CQ-QE-----  
-----YPLASLSTSMSTQATSS-----ESFTAHAS  
-----SHDS-YAAH-AQSYCT-----PP--SYSTTAHPYSMDS-YQYGS--QYPSQ-GXXXXXX-XXXXXX-----  
--XXXXXXXXXX-XXXXXX--XXXX-XXXX-----

>Pax3/7b\_\_B.\_belcheri/1-470

-----MALF---FVLP-----GQGRVNQLGGVFINGRPLPNHIRHKIVEMAAAGIRP  
CVISRQLRVSHGCVSKILCRYQETGSIKPGAIGGSKPR-VATPEVEKKIEDYKRDNPGMFSWEIRDRLLDKGMCDRSTVPS-----VSSI  
SRILRGGKGDGRRSEDDSE-DERRDG-----EDGEKRSHSIDGILGKGG-----CRG  
E-D-SDCDSEPDPLPKRQRRSRTTFTPEQLEELEKAFERTHYDPIYTREELAQRKLTARVQVWFSNRRARWRKQAGAQQ---LAGF-  
-NHL-LP-----MGYPAGATAHASAAY---VP-----LADTS---YPITSQVE---ST-----  
-----TLHRPQPLPST-VHQSM-----ADSTSSYGTAGKA---YQFTGLSDSFVATAAN-----  
--HNTLSGG---VLNILG-----NPST---CQ-QD-----  
-----YPLASLSTSMSTQATSS-----ESFTAHAS  
-----THDS-YAAH-AQSYCT-----PP--SYSTTAHPYSMDS-YQYGS--QYPSQ-GSCTSSY-GSTGTS-----  
--LSSLRQKSLVH--PLGMIPV--GSGT-GQAY-----

>Pax3/7b\_\_B.\_floridae/1-468

-----MALF---FVLP-----GQGRVNQLGGVFINGRPLPNHIRHKIVEMAAAGIRP  
CVISRQLRVSHGCVSKILCRYQETGSIKPGAIGGSKPR-VATPEVEKKIEDYKRDNPGMFSWEIRDRLLDKGMCDRSTVPS-----VSSI  
SRILRGGKGDGRRSEDDSE-DERRDG-----EDGEKRSHSIDGILGKGG-----CRG  
E-D-SDCDSEPDPLPKRQRRSRTTFTPEQLEELEKAFERTHYDPIYTREELAQRKLTARVQVWFSNRRARWRKQAGAQQ---LAGF-  
-NHL-LP-----MGYPAGATAHASAAY---VP-----LADTS---YPITSQVE---ST-----  
-----TLHRPQPLPST-VHQSM-----ADSTSSYGTAGKA---YQFTGLSDSFVATAAN-----  
--HNTLSGG---VLNILG-----NPST---CQ-QD-----  
-----YPLASLSTSMSTQATSS-----ESFTAHAS  
-----THDS-YA---AQSYCT-----PP--SYSTTAHPYSMDT-YQYGS--QYPSQ-GSCTSSY-GSTGTS-----  
--LSSLRQKSLVH--PLGMIPV--GSGT-GQAY-----

>Pax3/7b\_\_B.\_lanceolatum/1-470

-----MALF---FVLP-----GQGRVNQLGGVFINGRPLPNHIRHKIVEMAAAGIRP  
CVISRQLRVSHGCVSKILCRYQETGSIKPGAIGGSKPR-VATPEVEKKIEDYKRDNPGMFSWEIRDRLLDKGMCDRSTVPS-----VSSI  
SRILRGGKGEGRASEDDSE-DERRDG-----EDGEKRSHSIDGILGKGG-----CRG  
E-D-SDCDSEPDPLPKRQRRSRTTFTPEQLELEKAFERTHYDPIYTREELAQRKLTARVQVWFSNRRARWRKQAGAQQ---LAGF-  
-NHL-LP-----MGYPAGATAHASAAY---VP-----LADTS---YPITSQVE---ST-----  
-----TLHRPQPLPST-VHQSM-----ADSTSSYGTASKA---YQFTGLSDSFVATAAN-----  
--HNTLSGG---VLNILG-----NPST---CQ-QD-----  
-----YPLASLSTSMSTQATSS-----ESFTAHAS  
-----THDS-YAAH-AQSYCT-----PP--SYSTTAHPYSMDT-YQYGS--QYPSQ-GSCTSSY-GSTGTS-----  
--LSSLRQKSLVH--PLGMIPV--GSGT-GQAY-----

>Pax3/7a\_\_A.\_lucayanum/1-478

-----MNMTRQPGGPVATFR-PAFPLE-----XXGRVNQLGGVFINGRPLPNHIRHKIVEMAAAGIRP  
CVISRQLRVSHGCVSKILCRYQETGSIKPGAIGGSKPR-VATPEVEKKIEDYKRDNPGMFSWEIRDRLLDKGMCDRSTVPS-----VSSI  
SRILR---GKGHKISDLELE-A-DEAS-----SDGDRK-PHSIDGILGKNG-----LG  
D-S-SDCDSEPDXXXXXXSRTTFTPEQLELEKAFERTHYDPIYTREELAQRKLTARVQVWFSNRRARWRKQQAQQ---MASF-  
-----MP-----LGYG-GAPAAGPTY-----MP-----VPEPA---YPTTTCQD-----SA-----  
-----TLHRPQPLPPTS-IHQSGA-----ADTASMYGTASKP---YQYP-FSDTYLSASSAGLS---  
-VSNMSSG---LMNGLG-----SVSA---QQ-EA-----  
-----FPVHCVPAAGSN-SPATSI-----PSTDCYSS-T-----  
-----AADT-YTFNTAQTYCS-----TPAHSYSTAHAYSMD-----GS--W--VQ-GTSSTDF-NSNSLG-----  
--IAALRQKSREHSAALGLIQV---AGGAMAQAY-----

>Pax3/7a\_B.\_belcheri/1-481  
-----MNMTRQAGGPVATFR-PAFPLE-----GQGRVNQLGGVFINGRPLPNHIRHKIVEMAAGIRP  
CVISRQLRVSHGCVSKILCRYQETGSIKPGAIGGSKPR-VATPEVEKKIEDYKRDNPGMFSWEIRDRLKDGMCDRSTVPS-----VSSI  
SRILR---GKGHKISDLECE-GDDDT-----IDSDRK-PHSIDGILGEKNG-----PG  
D-S-SDCSEPDPLPKRKRRTTFTPEQLEELEKAFERTHYPDYITREELAQRTKLTEARVQVWFVSNRRARWRKQQAQ---IPSF-  
-----MP-----LGYP--APAAGPTY-----MP-----VPEPA-----YPTNA-PD-----SA-----  
-----TLHRPQLPPTS-IHQSGA-----ADTASMYGTASKP-----YQYP-FSDSYLSTASTGLS-----  
-VSSGMSTG---LVNGLG-----SMSS---QQVDP-----  
-----YPVHCAPASSSTSPATSL-----PSSDCYSSST-----  
-----AADT-YSYNTAQTCT-----APAHFSSTAHAYSMD-----GS--W--VQGGTNTDF-NSNSLG-----  
--IAALRQKSREHSAAALGLIQV---AGGAMAQAY-----

>Pax3/7a\_B.\_floridae/1-479  
-----MNMTRQAGGPVATFR-PAFPLE-----GQGRVNQLGGVFINGRPLPNHIRHKIVEMAAGIRP  
CVISRQLRVSHGCVSKILCRYQETGSIKPGAIGGSKPR-VATPEVEKKIEDYKRDNPGMFSWEIRDRLKDGMCDRSTVPS-----VSSI  
SRILR---GKGHKISDLEIE-GEDDFS-----IDGDRK-PHSIDGILGEKNG-----PG  
D-S-SDCSEPDPLPKRKRRTTFTPEQLEELEKAFERTHYPDYITREELAQRTKLTEARVQVWFVSNRRARWRKQQAQ---IPSF-  
-----MP-----LGYP--APAAGPTY-----MP-----VPEPA-----YPANA-QD-----SA-----  
-----TLHRPQLPPTS-IHQNGA-----ADTASMYGTASKP-----YQYP-FSDSYLSSGSTGLS-----  
-VSSGMSTG---LVGGLG-----SMGS---QQVEP-----  
-----FPVHCAPVSSSSSPATSI-----PSTDCYSS-T-----  
-----AADT-YSYNTAQTCT-----APAHYSYSSAHAYSMD-----GS--W--VQ--GANSTDF-NSNSLG-----  
--IAALRQKSREHSAAALGLIQV---AGGAMAQAY-----

>Pax3/7a\_B.\_lanceolatum/1-479  
-----MNMTRQAGGPVATFR-PAFPLE-----GQGRVNQLGGVFINGRPLPNHIRHKIVEMAAGIRP  
CVISRQLRVSHGCVSKILCRYQETGSIKPGAIGGSKPR-VATPEVEKKIEDYKRDNPGMFSWEIRDRLKDGMCDRSTVPS-----VSSI  
SRILR---GKGHKISDLEME-GEDELS-----IDGDRK-PHSIDGILGEKNG-----PG  
D-S-SDCSEPDPLPKRKRRTTFTPEQLELEKAFERTHYPDYITREELAQRTKLTEARVQVWFVSNRRARWRKQQAQ---IPSF-  
-----MP-----LGYP--APAAGPTY-----MP-----VPEPA-----YPTNA-QD-----SA-----  
-----TLHRPQLPPTS-IHQSGA-----ADTASMYGTASKP-----YQYP-FTDSYLSGSTGLS-----  
-VSSGMSTG---LVNGLG-----SMGS---QQVDP-----  
-----YPVHCAPASSSTSPATSI-----PSTDCYSS-T-----  
-----AADT-YSYNTAQTCT-----APAHYSYSSAHAYSMD-----GS--W--VQ--GANSTDF-NSNSLG-----  
--IAALRQKSREHSAAALGLIQV---AGGAMAQAY-----

>Pax3/7\_H.\_roretzi/1-704  
-----MMHRP---GTFR-PAFPLE-----GQGRVNQLGGVFINGRPLPNHIRHKIVEMAAGIRP  
CVISRQLRVSHGCVSKILCRYQETGSIKPGAIGGSKPK-VTNSEIESKIEYKQKDSPSMFSWEIRDQLIKEGLCDRSSAPT-----VSAI  
SRILR-----SKGCDTSNE-SAEDP-----ENGNTNSDTSNGATGER-----EAD  
E-GSDCSEPELPLKRRKRRTTFSADQLEELERCERTHYPDYITREELAQRTRLTEARVQVWFVSNRRARWRKQMAAQ---LPAIH  
PHHT-HPHLPHHLGAYHQTIAAAGMSAHNYMLQAAAAAQHPPSSNPLAQNG---HSSHYAAHPSAHGHLPTTPTAASAGTSVCGPI  
ESSFASPTAHDLGSVHRHHTHPLSPLHHAHPYSQAGMRVDGSHDAALNVAAVAAGYGLVGAS---AAAARYSAQFPS-TAFGDGY---  
HQHHSLSPE--SSIFGVNGSVHSHAPGAADLTVSDYGRPQTESSHVRQHQSAAVGGSTTRTSENHSPSSSPRQHQQTGGGISHDSVSG  
NGRRSESSAGSHDNHPRNGVSNSTSSPVTTSSEHVSQMPES-VYNQRPNSAPMHLQQQSHQSAHLQHLRGGPSVDHTSCNGNQMIQSS  
QYSLMHRSNVPEHSSIQSAAAYSAGFGVTAD-----P---SMATAAHQYHTTHNPFASC--QY-SGYQAASDY-ENAGIT-----  
----ALRMKSREHSAAALGLISVGAGGATSMQPAY-----

>Pax3/7\_C.\_intestinalis/1-625  
-----MMHPG---SNFR-PAFPLE-----GQGRVNQLGGVFINGRPLPSHVRHKIVEMAAGVPRP  
CVISRQLRVSHGCVSKILCRYQETGSIKPGAIGGSKPK-VATADVNDKIEEYKKNPFIWEIFSWEIRERLLIKEGICDRSNVPS-----VSSI  
SRTLRL-----AKGCDVENE-SESSA-----RLDPGNRSSSSGG-----EPN  
EVGSDSESEPDPLPKRKRRTTFSAEQLELEERCERTHYPDYITREELAQRTRLTEARVQVWFVSNRRARWRKQMAAQFHGIPAHH  
PHHL-SP-----HLGYPHTMPGVSQGAHNYMLQTSGAHH-----VQSM-----HESF--AHTASSHDH-----GS-----  
-----SLHRPHASVLTSPVHA---SQA-IRYDITD--PLNQSA-AAAYGLMGASAAAAAARYS-QYPSAAAFGDYPIH  
YHHHSTSPSSGSSIFGFPSTRQTATNPVELT-----TGNPHSGPNSSPIDVG-----SPGEAGNHPLHQ-----QHFVLAQ  
SARRAHQASNQRNHHNHGSETTAPSTSPASNGDGHPTTIESQ--SRAYSALAGQHHNTDLH-----SSTS VAGQQTAML  
SSVDHSSNVFAGQE-RGAPSSRAGYGVGSPGFATGEVLP--TSSAASHQ-----SYASC--QY-SPYQASGDY-GSAGIA-----  
----ALRMKSREHSASIGLIPV--GGGPSVQHAY-----

>Pax3/7\_S.\_kowalevskii/1-438  
-----MIQPG---RSFAAPGFPLE-----GQGRMNQLGGLFINGRPLPNHIRYKIVEMAAGGIRP  
CQISRQLRVSHGCVSKILCRYQETGSIKPGAIGGSKPK-VATVEVEKRIEDYKRDNEGIFWEIFSWEIRERLLIKEGICDRSNVPS-----VSSI  
SRILRHGN---GRHKTNEHEKVCRADG-----NAERAKNSHSIEGILN-----KRD  
EEDPYEPELQPDPLPKRKRRTTFTCEQLELEKAFDRTHYPDYITREELAQRRTGLTEARVQVWFVSNRRARWRKQASFLP---LNGY-  
-----SP-----WYPMATTGVSMPVPSAGPPCVLPDTMHSFSPQDFSLPPSHPSRLYQNSFYTYQNPPTFSLPSMP-----  
-----DLSTGSKSVVSGPVHQ-----HVYQGPQYVQSSSLCKNPIMNR  
PIIPPVSKSPVCSLPMIVN-----HPMTPTVTNTPCQFPSP-----  
-----PWHTMPAGGQEPY-----QQVSQFSPKHGLYSSFM-----  
-----

>Gsb\_T.\_castaneum/1-399  
-----MAPYF---TGYPFQ-----GQGRVNQLGGVFINGRPLPNHIRKIVEMAAGIRP  
CVISRQLRVSHGCVSKILNRYQETGSIKPGAIGGSKPR-VATLEVEARIEQLKKEEPQIFWEIFSWEIRDRLIKEGICDRSNVPS-----VSSI  
SRLLRG---G--RKE-----DPD--RKNHSIEGILGNSS-----CD-  
---ESDTESEPGIPLKRRKRRTTFTGEQLEALERAFGRGTQYPDVYITREELAQRTKLTEARVQVWFVSNRRARLRKQLNSQ---LNAF-

-NSMSLP-----SAFP-----V----QHGYGDP-----FNQSTWAQQSYASAALSSGALPHSALTTGGAST  
-----SVASSTPNTL----YNSY-----NSAATLDQNNQFGYNMAQVSPNQHSVSP-----AAH  
QQSAVWSRQNNKVAENL-----SSWHENYSL-----  
-----FAGSHYGAHSPSEAKSGYPYLGTMDCASRVH-----  
-----

>Gsb-n\_\_T.\_castaneum/1-338

-----MDMRPIF-----GGYPFQ-----GQGRVNQLGGVFINGRPLPNHIRLKVEMAAGVVRP  
CVISRQLRVSHGCVSKILNRYQETGSIRPGVIGGSKPR-VATPEIETRIEQMKKENPTIFSWEIRERLIKEGVTD---PPS-----VSSI  
SRLLRG---GGRRDG-----DPDGKKDYTIDGILGGRE-----E-  
---ESDTESEPGIPLKRKQRRSRTTFSGEQLEALERAFSRTQYDPVYTREELAQQTGLTEARIQVWFSNRRARLRKHVGNNSN---ALAF-  
-PLANMP-----CQYP-----AESAHQHDWRNAQ---FTNYNMFQQ-----T  
-----SYTNPQENRD---Y-----SAIFDAN---YATLMAQ-----  
-----KNKESDAKNLGG-----NPGTSW-ANFQD-----  
-----FSGDQY---APKNYWA-----  
-----

>Prd\_\_T.\_castaneum/1-414

-MTVTGNLIGIM---HRHC-----FGYPFQGTYYKYTGCSNDNGFLP-----GQGRVNQLGGVFINGRPLPNHIRLKVEMAANGIRP  
CVISRQLRVSHGCVSKILNRYQETGSIRPGVIGGSKPR-VATPEVENRIEQYKRENPSIFSWEIRDRLVKEGICDRSTAPS-----VSAI  
SRLLRSG---GGECDEITIQAILIFS-----VTN--PTIKEDFCAVLWKDKS-----TDN  
EG-VSDCDSEPGIPLKRKQRRSRTTFTAHLQLELEKAFERTQYDPDIYTREELAQRKLTARVQVWFSNRRARLRKQITSAA---TPLV-  
-RSY-AP-----ERYP-----P-----LAQGVNDDAF-----N  
-----SVATPTPTSMTELYPSV-----PGHSTSPNL---PLTHNIAH-----NPY  
PSHSIYPPSSNLMPLNNI-Q-----NLSQS-GINYKD-----  
-----TNDNNVSAV---TTQH---QGYPTNTVTILGPNSGNT-PKI-----  
-----LLQI-----

>Pax3/7\_\_C.\_gigas/1-466

MFGFVNGFGVYLINERLI-----VRYPTAMFSYHLAAL---GLMPSFQMEGQGRVNQLGGVFINGRPLPNHIRLKVIELAAQGVVRP  
CVISRQLRVSHGCVSKILQRYQETGSIRPGVIGGSKPR-VATPEVEKKIEQYKRENPGIFSWEIRDRLKKEGICDRSSVPS-----VSSI  
SRVLRSKFQNIQSDSEDEEPRPSDDIS-----VNDNEKSSKYSIDGLLADDKS-----EKS  
EDEESDCDSEPGLSVSRKQRRSRTTFTAELQLELERAFERTHYDPDIYTREELAQRKLTARVQVWFSNRRARWRKQMGSNQ---ISAL-  
-NSI-L-----H-----LPQGGASSYL-----L  
-----HETTPS-----YPLP-----SVSDTLWHRNSMTHHLQNFSSLKTNDSSAYAGLMENY  
LSHA-----SQMHNH-T-----NPTDSLASNWCS-----  
-----PVTSSVSALAYQTTTNNHFNPHGYGDVTKSTLHPYNHSI-ASVSSAERCAID  
ESLVALRMKSREHSAAALSLMQVTDNKMSASF-----

>Pax3/7\_\_C.\_teleata/1-416

-----MLQRL-----FPLG-----LPPLLPTYGLDQGRVNQLGGVFINGRPLPNHIRLKIEMASQGVVRP  
CVISRQLRVSHGCVSKILQRYQETGSIRPGSIGGSKPR-VATPDVEDRIHDLKKNENPGIFSWEIRDRLKDGVCDRSSVPS-----VSSI  
SRVLRSHL---REGDEDKIDDEDEES-----KDD-----DDD  
DDDSESLTSEPGLSLRSKQRRSRTTFSADQLEHLEKAFDRTHYPDIYTREELAQRSGLTEARVQVWFSNRRARWRKQMGSGQ---LASSF  
NSLLSAA-----SGYS-----STPS---YTPSLNQDHP-----  
-----ALPHPTSPVPAPPIKAESL-----PPAFSDPFRQHSHPYPF---  
-----LPGPTPHHPVSQ-----  
-----SLMTSVASSWNSAMSSLRSSACLPPYPSYPPSSMQHPFHYSFNAGHE  
AGSYPPSGKVHAPTPIGLGSFGAMAPSHIVSGL-----

### Supplementary File 3: FASTA format alignment of cephalochordate Pax3/7 genes

>Pax3/7a\_\_B.\_lanceolatum/1-479  
MNMMTMRQAGGPVATFRPAFLGQGRVNQLGGVFINGRPLPNHIRHKIVEMAAAGIRPCVISRQLRVSHGCVSKILCRYQETGSIKPGAIGG  
SKPRVATPEVEKKIEDYKRDNPGMFSWEIRDRLKDGMCDRSTVPSVSSISRILR--GKGHKISDLEMEGEDELSDGDRK-PHSIDGILGE  
KNG-PGDSSDCDSEPDPLPKRKRQRRSRTTFTPEQLDELEKAFERTHYDITYTREELAQRKLTARVQVWFNRRARWRKQGAQIPSF---  
MPLGYP--APAAGTPTYMPVPEPAYPTNA-QDSATLHRPQLPPTS IHQSGAADTASMYGTASKPYQYP-FTDSYLSGSGTGLSVSSGMSTGL  
VNLGSMGSSQVDPYPVHCAPASSSTSPATSIPTDCYSS-TAADTYSYNTAQTCTAPAHSYSSSAHAYSMD----GSW--VQ-GANSTDFN  
SNSLGIALLRQKRSREHSALGLIQVAGGAMAQAY

>Pax3/7a\_\_B.\_floridae/1-479  
MNMMTMRQAGGPVATFRPAFLGQGRVNQLGGVFINGRPLPNHIRHKIVEMAAAGIRPCVISRQLRVSHGCVSKILCRYQETGSIKPGAIGG  
SKPRVATPEVEKKIEDYKRDNPGMFSWEIRDRLKDGMCDRSTVPSVSSISRILR--GKGHKISDLEIEGEDDFSIDGDRK-PHSIDGILGE  
KNG-PGDSSDCDSEPDPLPKRKRQRRSRTTFTPEQLEELEKAFERTHYDITYTREELAQRKLTARVQVWFNRRARWRKQGAQIPSF---  
MPLGYP--APAAGTPTYMPVPEPAYPANA-QDSATLHRPQLPPTS IHQNGAADTASMYGTASKPYQYP-FSDSYLSGSGTGLSVSSGMSTGL  
VGGLGSMGSSQVPEFPVHCAPVSSSSSPATSIPTDCYSS-TAADTYSYNTAQTCTAPAHSYSSSAHAYSMD----GSW--VQ-GANSTDFN  
SNSLGIALLRQKRSREHSALGLIQVAGGAMAQAY

>Pax3/7a\_\_B.\_belcheri/1-481  
MNMMTMRQAGGPVATFRPAFLGQGRVNQLGGVFINGRPLPNHIRHKIVEMAAAGIRPCVISRQLRVSHGCVSKILCRYQETGSIKPGAIGG  
SKPRVATPEVEKKIEDYKRDNPGMFSWEIRDRLKDGMCDRSTVPSVSSISRILR--GKGHKISDLEIEGEDDFSIDSDRK-PHSIDGILGE  
KNG-PGDSSDCDSEPDPLPKRKRQRRSRTTFTPEQLEELEKAFERTHYDITYTREELAQRKLTARVQVWFNRRARWRKQGAQIPSF---  
MPLGYP--APAAGTPTYMPVPEPAYPTNA-PDSATLHRPQLPPTS IHQSGAADTASMYGTASKPYQYP-FSDSYLSTASTGLSVSSGMSTGL  
VNLGSMGSSQVDPYPVHCAPASSSTSPATSLPSSDCYSSTTAADTYSYNTAQTCTAPAHSSSTAHAYSMD----GSW--VQGGTNSTDFN  
SNSLGIALLRQKRSREHSALGLIQVAGGAMAQAY

>Pax3/7a\_\_A.\_lucayanum/1-478  
MNMMTMRQPGGPVATFRPAFLGQGRVNQLGGVFINGRPLPNHIRHKIVEMAAAGIRPCVISRQLRVSHGCVSKILCRYQETGSIKPGAIGG  
SKPRVATPEVEKKIEDYKRDNPGMFSWEIRDRLKDGMCDRSTVPSVSSISRILR--GKGHKISDLELEA-DEASSDGRK-PHSIDGILGE  
KNG-LGDSSDCDSEPDXXXXXXXSRTTFTPEQLDELEKAFERTHYDITYTREELAQRKLTARVQVWFNRRARWRKQGAQMASF---  
MPLGYP-GAPAAGTPTYMPVPEPAYPTTTCQDSATLHRPQLPPTS IHQSGAADTASMYGTASKPYQYP-FSDTYLSASSAGLSVNGMSSGL  
MNLGSSVSAQQ-EAFPVHCVPAGSN-SPATSIPTDCYSS-TAADTYTNTAQTCTAPAHSSSTAHAYSMD----GSW--VQ-GTSSTDFN  
SNSLGIALLRQKRSREHSALGLIQVAGGAMAQAY

>Pax3/7b\_\_B.\_lanceolatum/1-470  
-----MALF---FVLPGQGRVNQLGGVFINGRPLPNHIRHKIVEMAAAGIRPCVISRQLRVSHGCVSKILCRYQETGSIKPGAIGG  
SKPRVATPEVEKKIEDYKRDNPGMFSWEIRDRLKDGMCDRSTVPSVSSISRILRGGKGEGRASEDGDSEDERRDGEDGKRSHSIDGILGE  
KGGCRGEDSDCDSEPDPLPKRKRQRRSRTTFTPEQLDELEKAFERTHYDITYTREELAQRKLTARVQVWFNRRARWRKQAGAQLAGFNHL  
LPMGYAPAGATAHASAAYVPLADTSYPITSQVESTTLHRPQLPSTVHQSMADSTSSYGTASKAYQFTGLSDSFVATAAN---HNTLSGGV  
LNLGNPSTCQ-QDYPLASLSTSMSTQATSSSEFTAHAS--THDSYAAH-AQSYCTPP--SYSTTAHPYSMDTYQYGSQYPSQ-GSCTSSYG  
STGTSLSLRLQKSLVH--PLGMIPVGSQT-GQAY

>Pax3/7b\_\_B.\_floridae/1-468  
-----MALF---  
FVLPGQGRVNQLGGVFINGRPLPNHIRHKIVEMAAAGIRPCVISRQLRVSHGCVSKILCRYQETGSIKPGAIGGSKPRVATPEVEKKIEDYK  
RDNPGMFSWEIRDRLKDGMCDRSTVPSVSSISRILRGGKGDGRSEEDGDSEDERRDGEDGKRSHSIDGILGEKGGCRGEDSDCDSEPDPL  
KRKRQRRSRTTFTPEQLEELEKAFERTHYDITYTREELAQRKLTARVQVWFNRRARWRKQAGAQLAGFNHLPMGYAPAGATAHASAAYV  
LADTSYPITSQVESTTLHRPQLPSTVHQSMADSTSSYGTAGKAYQFTGLSDSFVATAAN---HNTLSGGVNLGNPSTCQ-QDYPLAS  
LSTSMSTQATSSSEFTAHAS--THDSYA--AQSYCTPP--SYSTTAHPYSMDTYQYGSQYPSQ-GSCTSSYSGTGTSLSLRLQKSLVH--  
PLGMIPVGSQT-GQAY

>Pax3/7b\_\_B.\_belcheri/1-470  
-----MALF---FVLPGQGRVNQLGGVFINGRPLPNHIRHKIVEMAAAGIRPCVISRQLRVSHGCVSKILCRYQETGSIKPGAIGG  
SKPRVATPEVEKKIEDYKRDNPGMFSWEIRDRLKDGMCDRSTVPSVSSISRILRGGKGDGRSEEDGDSEDERRDGEDGKRSHSIDGILGE  
KGGCRGEDSDCDSEPDPLPKRKRQRRSRTTFTPEQLEELEKAFERTHYDITYTREELAQRKLTARVQVWFNRRARWRKQAGAQLAGFNHL  
LPMGYAPAGATAHASAAYVPLADTSYPITSQVESTTLHRPQLPSTVHQSMADSTSSYGTAGKAYQFTGLSDSFVATAAN---HNTLSGGV  
LNLGNPSTCQ-QDYPLASLSTSMSTQATSSSEFTAHAS--THDSYAAH-AQSYCTPP--SYSTTAHPYSMDTYQYGSQYPSQ-GSCTSSYG  
STGTSLSLRLQKSLVH--PLGMIPVGSQT-GQAY

>Pax3/7b\_\_A.\_lucayanum/1-469  
-----MALF---FVLPGQGRVNQLGGVFINGRPLPNHIRHKIVEMAAAGIRPCVISRQLRVSHGCVSKXXXXXXXXXXXXXXXXXGG  
SKPRVATPEVEKKIEDYKRDNPGMFSWEIRDHLKDGMCDRSTVPSVSSISRILRGGKGDGRSDD-DSEDERKDGEDGKRSHSIDGILGE  
KGGCRGEDSDCDSEPDPLPKRKRQRRSRTTFTPEQLDELEKAFERTHYDITYTREELAQRKLTARVQVWFNRRARWRKQAGAQLAGFNHL  
LPMGYAPAGATAHASAAYVPLADTSYPITSQVESTTLHRPQLPSTVHQSMADSTSSYGTAGKAYQFTGLSDSFVATAAN---HNTLSGGV  
LNLGNPSTCQ-QDYPLASLSTSMSTQATSSSEFTAHAS--SHDSYAAH-AQSYCTPP--SYSTTAHPYSMDTYQYGSQYPSQ-GXXXXXX  
XXXXXXXXXXXXXXXXX-XXXXXXXXXXXX-XXXX

## Supplementary File 4: Python script to map equivalent support values between unadorned .nwk format trees

```
import re
from collections import OrderedDict
from math import log10, floor

try:
    import pyperclip
except ImportError:
    pyper = False
else:
    pyper = True

from comparatordata import *

""" FORMAT TREE FUNCS """

def makespecieslist(speciesstring):
    """ Makes comma-delimited species string into species list """
    specieslist = speciesstring.split(",")
    specieslist2 = []
    for item in specieslist:
        specieslist2.append(item.replace(" ", ""))
    return specieslist2

def curatespecieslist(specieslist, replacedict):
    """ Removes colons, replaces digits with placeholders, adds inverted commas if missing """
    curatedspeciesdict = {}
    for item in specieslist:
        rplace = item.replace(":", "")
        for key in replacedict:
            rplace = rplace.replace(key, replacedict[key])
        rplace = "\"" + rplace + "\""
        rplace = rplace.replace("\'", "\'")
        curatedspeciesdict[item] = rplace
    return curatedspeciesdict

def curatetreespecies(tree, curatedspeciesdict):
    """ Replaces the species names in a tree with the curated species names """
    edited = tree
    for find, replace in curatedspeciesdict.iteritems():
        edited = re.sub(find, replace, edited, 1)
    return edited

def curatetreelist(treelist, curatedspeciesdict):
    """ Replaces the species names in the trees in their list with the curated species names """
    curatedtreelist = []
    for tree in treelist:
        edited = curatetreespecies(tree, curatedspeciesdict)
        curatedtreelist.append(edited)
    return curatedtreelist

def curatetrees(speciesliststr, replacedict, treelist):
    """ Marshals the above funcs into order. """
    specieslist = makespecieslist(speciesliststr)
    curatedspeciesdict = curatespecieslist(specieslist, replacedict)
    curatedtreelist = curatetreelist(treelist, curatedspeciesdict)
    return curatedtreelist

def uncuratetrees(semifinaltree, replacedict):
    """ Marshals the above funcs to undo curatetrees() and replace the placeholders with digits """
    replacedict2 = dict((v, k) for k, v in replacedict.iteritems())
    specieslist = makespecieslist(speciesliststr)
    curatedspeciesdict = curatespecieslist(specieslist, replacedict)
    uncuratedspeciesdict = dict((v, "\'{}\''".format(k)) for k, v in
    curatedspeciesdict.iteritems())
    finaltree = curatetreespecies(semifinaltree, uncuratedspeciesdict)
    return finaltree

""" TOPOLOGY ANALYSIS FUNCS """
```

```

def parenthetic_contents(string):
    """ Generate parenthesized contents in string as pairs (level, contents)."""
    """ Borrowed and modified from Gareth Rees, stackoverflow.com/questions/4284991 """
    """ Takes tree string and returns list of the contents of each node, brackets & commas in
place """
    stack = []
    for i, c in enumerate(string):
        if c == '(':
            stack.append(i)
        elif c == ')' and stack:
            start = stack.pop()
            yield (string[start + 1: i])

def getlistofsupports(string):
    """ Takes tree string and returns list of support values in order - assuming\
no numbers in seq names. Removes all :###s and then returns all other ###s """
    string2 = re.sub(r'\d+(?:\.\d+)?', '', string)
    return re.findall(r'\d+(?:\.\d+)?', string2)

def splittolists(list1):
    """Takes items in messy list from parenthetic_contents(), cuts out brackets, and\
makes each item its own sublist of sequence names """
    list12 = []
    for item in list1:
        itemy = str(item)
        itemy2 = itemy.replace("(", "").replace(")", "")
        itemy3 = itemy2.split(",")
        itemy3.sort()
        list12.append(itemy3)
    return list12

def removeallnumbers(string):
    """ Removes all numbers and numbers preceded with a colon """
    string2 = re.sub(r':?\d+(?:\.\d+)?', '', string)
    return string2

def tuplifyalist(list1):
    """ Takes a list and returns a tuple - necessary to use as dict keys """
    return tuple(tuple(l) for l in list1)

def makeadict(tupley, listy):
    """ Takes a tuple of tuples and a list of lists and makes an ordered dict\
where each tuple in the tuple is a key for the corresponding sublist """
    dictionary = OrderedDict()
    for n, item in enumerate(tupley):
        if n < len(listy):
            dictionary[item] = listy[n]
    return dictionary

def gofrominputtorightdict(string):
    """ Uses the above functs to go from input string to support value dictionary """
    string2 = removeallnumbers(string)
    listofsupports = getlistofsupports(string2)
    list1 = list(parenthetic_contents(string2))
    list2 = splittolists(list1)
    tupleyboy = tuplifyalist(list2)
    dictyboy = makeadict(tupleyboy, listofsupports)
    return dictyboy

def maketreedicts(treelist):
    """ For each tree in the treelist, makes a support value dictionary above using above
funcs """
    dictlist = []
    for tree in treelist:
        treedict = gofrominputtorightdict(tree)
        dictlist.append(treedict)
    return dictlist

def formatsupportvalue(support):
    support2 = float(support)
    if support2 < 0:
        print support2, 'help'
    elif support2 > 0:
        if str(support2)[0:3] != "0.0":
            support2 = round(support2, n-int(floor(log10(float(support2))))-1)
        else:
            support2 = round(support2, n-int(floor(log10(float(support2))))-2)

```

```

else:
    support2 = "0." + "0"*n
    support2 = str(support2)
    support2 = support2[1:] if support2[0] == "0" else support2
    if len(support) > n+2:
        support2 = support2.ljust(n+1, '0')
    return support2

def makelistofappendedsupports(treedictlist, delinchar, nocladechar, mastertree):
    """ Take list of dictionaries of clades:supports and makes a list of appended supports
    """
    listofappendedsupports = []
    for clade in treedictlist[mastertree]:
        working = []
        for treedict in treedictlist:
            support = treedict[clade] if clade in treedict else nocladechar
            if support != nocladechar:
                support = formatsupportvalue(support)
            working.append(support)
        listofappendedsupports.append(delinchar.join(working))
    return listofappendedsupports

def replacewithappendedsupports(appendedsupports, mastertree):
    """ Takes the master tree and replaces the support values (###:) with the appended
    supports in quotations"""
    mastertreedictlist = []
    edited = mastertree
    for item in appendedsupports:
        edited2 = re.sub(r'\d+(?:\.\d+)?:', '\{"\}\#\":'.format(item), edited, 1)
        edited = edited2
        mastertreedictlist.append(edited2)
    return mastertreedictlist[-1].replace("#", "")

def formatoutput(finaltree, speciesliststr):
    specieslist = makespecieslist(speciesliststr)
    output = "#NEXUS\nbegin taxa;\n\tdimensions
ntax={0};\n\ttaxlabels".format(len(specieslist))
    for species in specieslist:
        output += "\n\t\t'\{0}'".format(species)
    output += "\n;\nend;\n\nbegin trees;\n\ttree mastertree_with_all_supports =
{0}\nend;".format(finaltree)
    return output

def __treecomparator__():
    """ Puts all above function together into core program """
    curatedtreelist = curatetrees(speciesliststr, replacedict, treelist)
    treedictlist = maketreedicts(curatedtreelist)
    # print treedictlist
    appendedsupports = makelistofappendedsupports(treedictlist, delinchar, nocladechar,
mastertree)
    semifinaltree = replacewithappendedsupports(appendedsupports,
curatedtreelist[mastertree])
    finaltree = uncuratetrees(semifinaltree, replacedict)
    if pyper == True:
        outputty = formatoutput(finaltree, speciesliststr)
        pyperclip.copy(outputty)
        print "Formatted tree copied to clipboard"
    else:
        print finaltree

if __name__ == "__main__":
    __treecomparator__()

```



## Supplementary Note: Settings for the phylogenetic analyses

### PHYLIP (changes from defaults)

seqboot:

|                      |      |
|----------------------|------|
| How many replicates? | 1000 |
|----------------------|------|

protdist:

|                                                               |                                |
|---------------------------------------------------------------|--------------------------------|
| Gamma distribution of rates among positions?                  | Yes                            |
| Analyze multiple data sets?                                   | Yes, 1000 data sets            |
| Coefficient of variation of substitution rate among positions | 1.360827635 (= 1 / sqrt(0.54)) |

neighbor:

|                                   |                                     |
|-----------------------------------|-------------------------------------|
| Outgroup root?                    | Yes, at species 1                   |
| Randomize input order of species? | Yes (random number seed =192837465) |
| Analyze multiple data sets?       | Yes, 1000 sets                      |

consense:

|                                |     |
|--------------------------------|-----|
| Trees to be treated as Rooted: | Yes |
|--------------------------------|-----|

### MEGA-CC (complete contents of the .mao file)

; Please do not edit this file! If this file is modified, results are unpredictable.  
; Instead of modifying this file, simply create a new MEGA Analysis Options file by using the MEGA Prototyper.

```
[ MEGAinfo ]
ver = 7170509-x86_64 Mac OS
[ DataSettings ]
datatype = snProtein
MissingBaseSymbol = ?
IdenticalBaseSymbol = .
GapSymbol = -
[ ProcessTypes ]
ppInfer = true
ppML = true
[ AnalysisSettings ]
Analysis = Phylogeny Reconstruction
Statistical Method = Maximum Likelihood
Phylogeny Test = =====
Test of Phylogeny = Bootstrap method
No. of Bootstrap Replications = 1000
Substitution Model = =====
Substitutions Type = Amino acid
Model/Method = JTT with Freqs. (+F) model
Rates and Patterns = =====
Rates among Sites = Gamma Distributed (G)
No of Discrete Gamma Categories = 4
Data Subset to Use = =====
Gaps/Missing Data Treatment = Partial deletion
Site Coverage Cutoff (%) = 15
Tree Inference Options = =====
ML Heuristic Method = Nearest-Neighbor-Interchange (NNI)
Initial Tree for ML = Make initial tree automatically (Default -
```

```

NJ/BioNJ)
  Branch Swap Filter           = None
  System Resource Usage        = =====
  Number of Threads            = 4
  Has Time Limit                = False
  Maximum Execution Time       = -1

```

### MrBayes (changes from defaults made in CIPRES interface)

|                                                                      |                   |
|----------------------------------------------------------------------|-------------------|
| Maximum Hours to Run:                                                | 168               |
| My Data Type is:                                                     | protein           |
| Specify (only) one outgroup:                                         | 6_Bf              |
| Set the model for among-site rate variation (Rates=)                 | gamma             |
| Set number of rate categories for gamma distribution (Ngammacat=)    | 4                 |
| Set the Rate Matrix for Amino Acids (Aamodelpr=)                     | Jones             |
| State Frequencies (Statefreqpr=)                                     | fixed (empirical) |
| Number of Generations (Ngen=)                                        | 500000000         |
| Stop early if the convergence diagnostic falls below the stop value? | Yes               |
| Please enter the stop value                                          | 0.01              |

The following parameters entered into the command line version should produce an equivalent analysis (untested)

```

prset aamodelpr=fixed(jones) statefreqpr=fixed(empirical)
outgroup 6_Bf
lset rates=gamma ngammacat=4
mcmc ngen=500000000 stoprule=YES stopval=0.01 samplefreq=100 printfreq=100 diagnfreq=1000

```
